# Supplementary material for: Significant enhancement in the thermoelectric performance of Bi2O2S through dimensionality reduction
Source: Royal Society of Chemistry journal article supplement (doi:10.1039/c9tc04648h), 2019-01-01
Supplement: c9tc04648h1.pdf [file c9tc04648h1.pdf]

## Electronic Supplementary Information

### I. ELECTRONIC TRANSPORT PROPERTIES OF N-TYPE $\text{Bi}_2\text{O}_2\text{S}$ BULK AND MONO LAYER

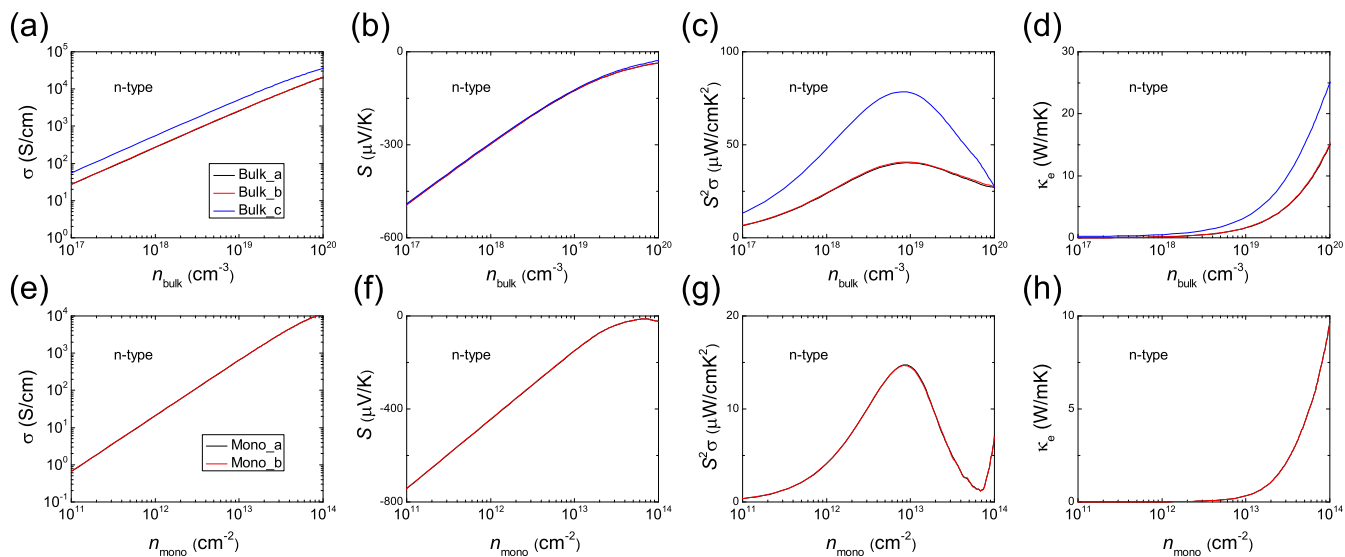

FIG. S1. The calculated electronic transport properties as a function of carrier concentration  $n$  for n-type  $\text{Bi}_2\text{O}_2\text{S}$  bulk (a, b, c, d) and n-type mono layer (e, f, g, h) at 300 K: the electrical conductivity  $\sigma$ , Seebeck coefficient  $S$ , power factor  $S^2\sigma$  and electronic thermal conductivity  $\kappa_e$ .

### II. PHONON TRANSPORT PROPERTIES FOR $\text{Bi}_2\text{O}_2\text{S}$ BULK AND MONO LAYER

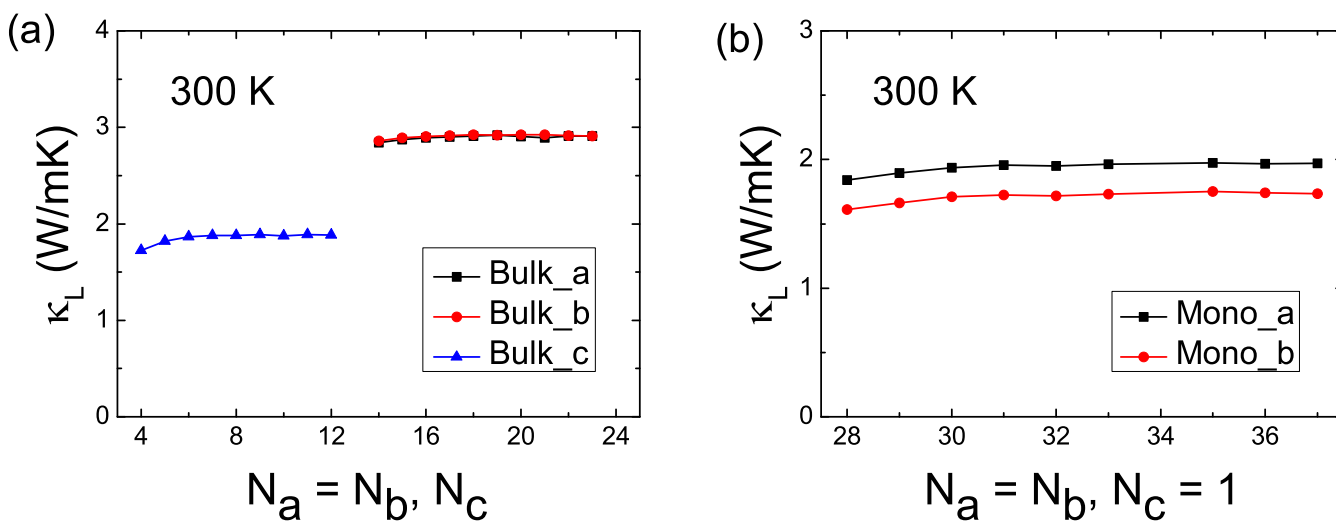

FIG. S2. The lattice thermal conductivity of  $\text{Bi}_2\text{O}_2\text{S}$  bulk (a) and mono layer (b) for different numbers of  $\mathbf{q}$  points ( $N_a \times N_b \times N_c$ ) at 300 K. The lattice thermal conductivity of  $N_a = N_b = 34$  for  $\text{Bi}_2\text{O}_2\text{S}$  mono layer is outputless.

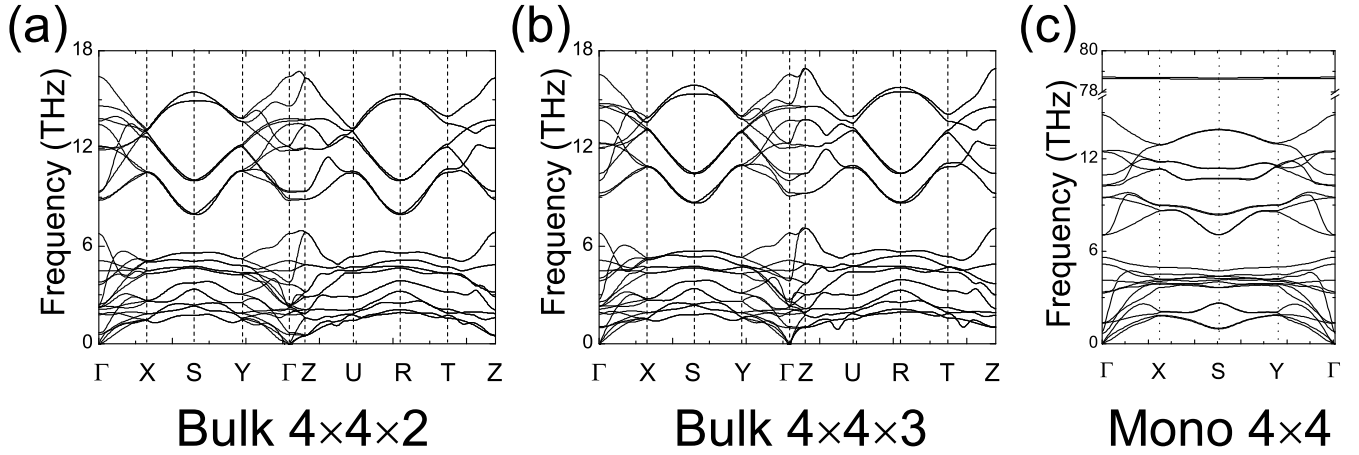

FIG. S3. The phonon dispersion relations with supercell size  $4 \times 4 \times 2$  (a) and  $4 \times 4 \times 3$  (b) for  $\text{Bi}_2\text{O}_2\text{S}$  bulk. The phonon dispersion relations with supercell size  $4 \times 4$  (c) for  $\text{Bi}_2\text{O}_2\text{S}$  mono layer.

### III. TRANSPORT PROPERTIES OF $\text{Bi}_2\text{O}_2\text{S}$ BILAYER

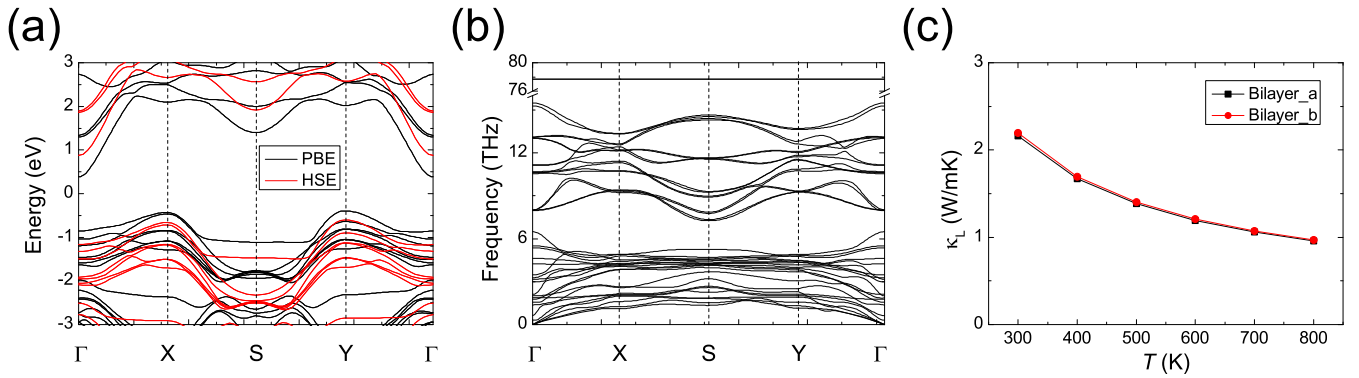

FIG. S4. (a) The band structure of  $\text{Bi}_2\text{O}_2\text{S}$  bilayer. The Fermi energy is set to 0 eV. (b) The phonon dispersion relations. (c) The calculated lattice thermal conductivity for  $\text{Bi}_2\text{O}_2\text{S}$  bilayer.

TABLE S1. The carrier relaxation time for  $\text{Bi}_2\text{O}_2\text{S}$  bilayer at 300 K in the  $a$  and  $b$  directions. The corresponding DOS effective mass  $m_{dos}^*$ , elastic constant  $C$  and DP constant  $E$  are also listed.

| Carrier type | $m_{dos}^*$ ( $m_e$ ) | $C$ (eV/Å)    | $E$ (eV/strain) | $\tau$ ( $10^{-14}$ s) |
|--------------|-----------------------|---------------|-----------------|------------------------|
| Electron     | 0.47                  | 14.79 ( $a$ ) | -11.96 ( $a$ )  | 2.79 ( $a$ )           |
|              |                       | 14.53 ( $b$ ) | -11.70 ( $b$ )  | 2.86 ( $b$ )           |
| Hole         | -1.91                 | 14.79 ( $a$ ) | -9.88 ( $a$ )   | 1.00 ( $a$ )           |
|              |                       | 14.53 ( $b$ ) | -7.90 ( $b$ )   | 1.54 ( $b$ )           |

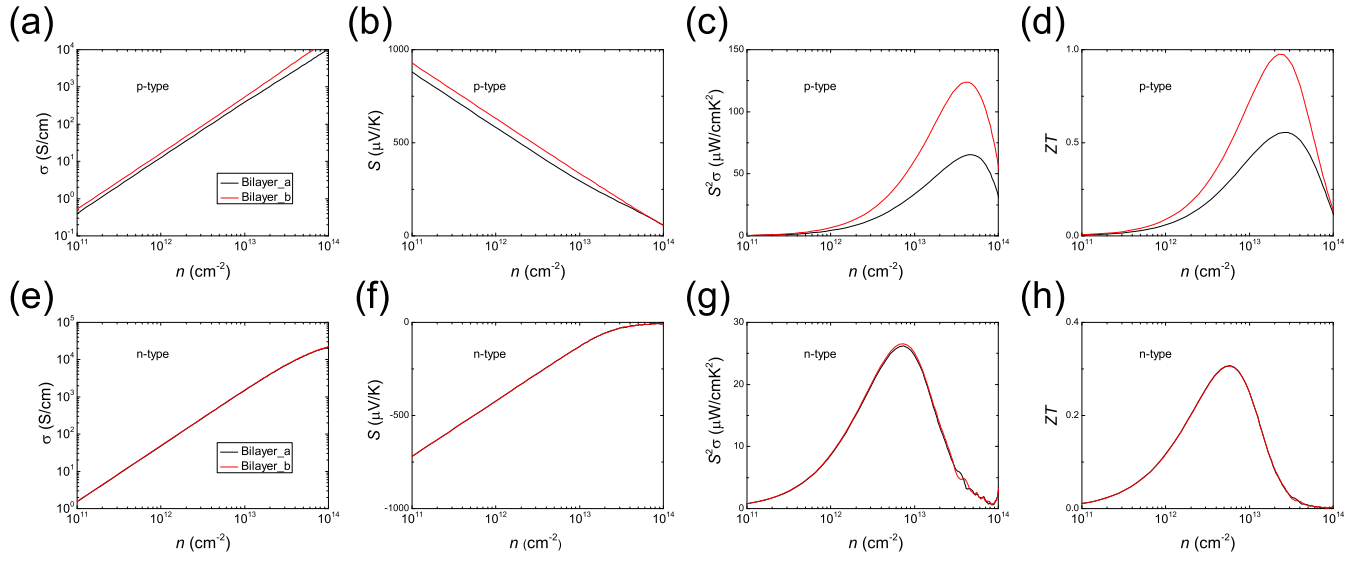

FIG. S5. The calculated transport properties as a function of carrier concentration  $n$  for p-type (a, b, c, d) and n-type (e, f, g, h)  $\text{Bi}_2\text{O}_2\text{S}$  bilayer at 300 K: the electrical conductivity  $\sigma$ , Seebeck coefficient  $S$ , power factor  $S^2\sigma$  and  $ZT$  value.
